# Supplementary material for: Strain-Modulated Photoelectric Responses from a Flexible α-In2Se3/3R MoS2 Heterojunction
Source: PubMed Central journal article supplement (PMC8128968; doi:10.1007/s40820-020-00584-1), 2021-02-15
Supplement: 40820_2020_584_MOESM1_ESM.pdf [file 40820_2020_584_MOESM1_ESM.pdf]

Supporting Information for

## Strain Modulated Photoelectric Responses from a Flexible $\alpha$ - $\text{In}_2\text{Se}_3/3\text{R MoS}_2$ Heterojunction

Weifan Cai<sup>1</sup>, Jingyuan Wang<sup>1</sup>, Yongmin He<sup>2</sup>, Sheng Liu<sup>3</sup>, Qihua Xiong<sup>3</sup>, Zheng Liu<sup>2</sup>, Qing Zhang<sup>1, \*</sup>

<sup>1</sup>Centre for Micro- & Nano-Electronics, School of Electrical and Electronic Engineering, Nanyang Technological University, Singapore 639798, Singapore

<sup>2</sup>School of Materials Science and Engineering, Nanyang Technological University, Singapore 639798, Singapore

<sup>3</sup>Division of Physics and Applied Physics, School of Physical and Mathematical Sciences, Nanyang Technological University, Singapore 639798, Singapore

\*Corresponding author. E-mail: [eqzhang@ntu.edu.sg](mailto:eqzhang@ntu.edu.sg) (Qing Zhang)

### Supplementary Tables and Figures

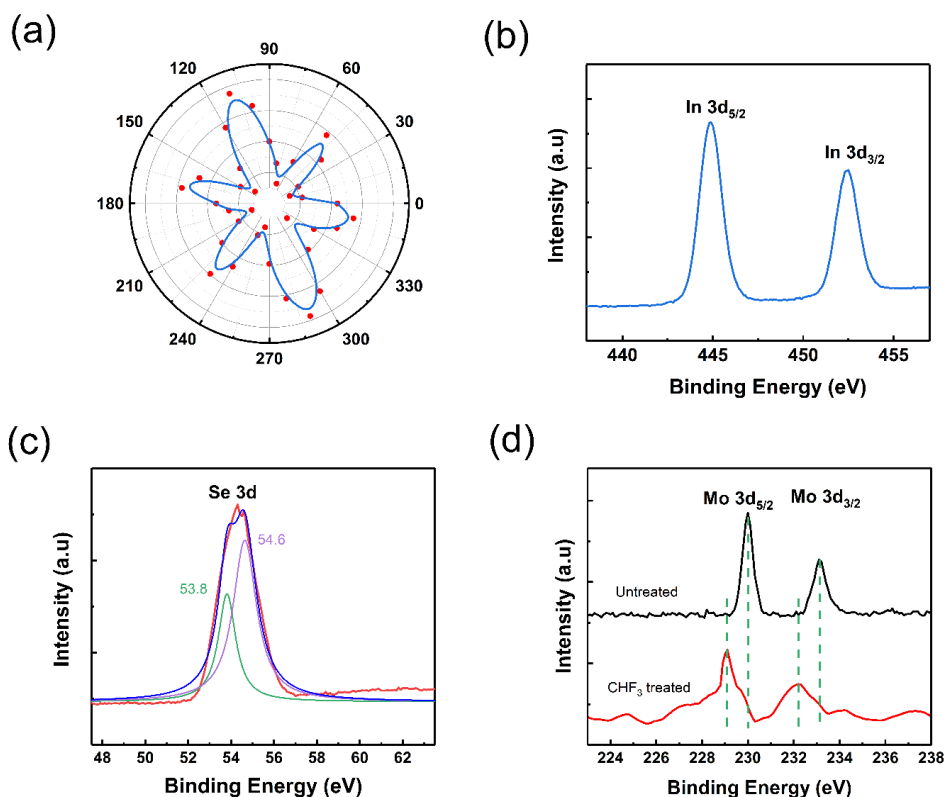

**Fig. S1** **a** Polarization dependence plot of SHG intensity of 3R MoS<sub>2</sub> flake in the heterojunction (**Fig. 1c**). The red dots are experimental data, and the blue solid lines are fitting lines. **b, c** XPS spectra of In 3d and Se 3d core orbital peaks from the  $\alpha$ -In<sub>2</sub>Se<sub>3</sub> flake. **d** Mo 3d core orbital peaks from the 3R MoS<sub>2</sub> flake before and after CHF<sub>3</sub> plasma treatment

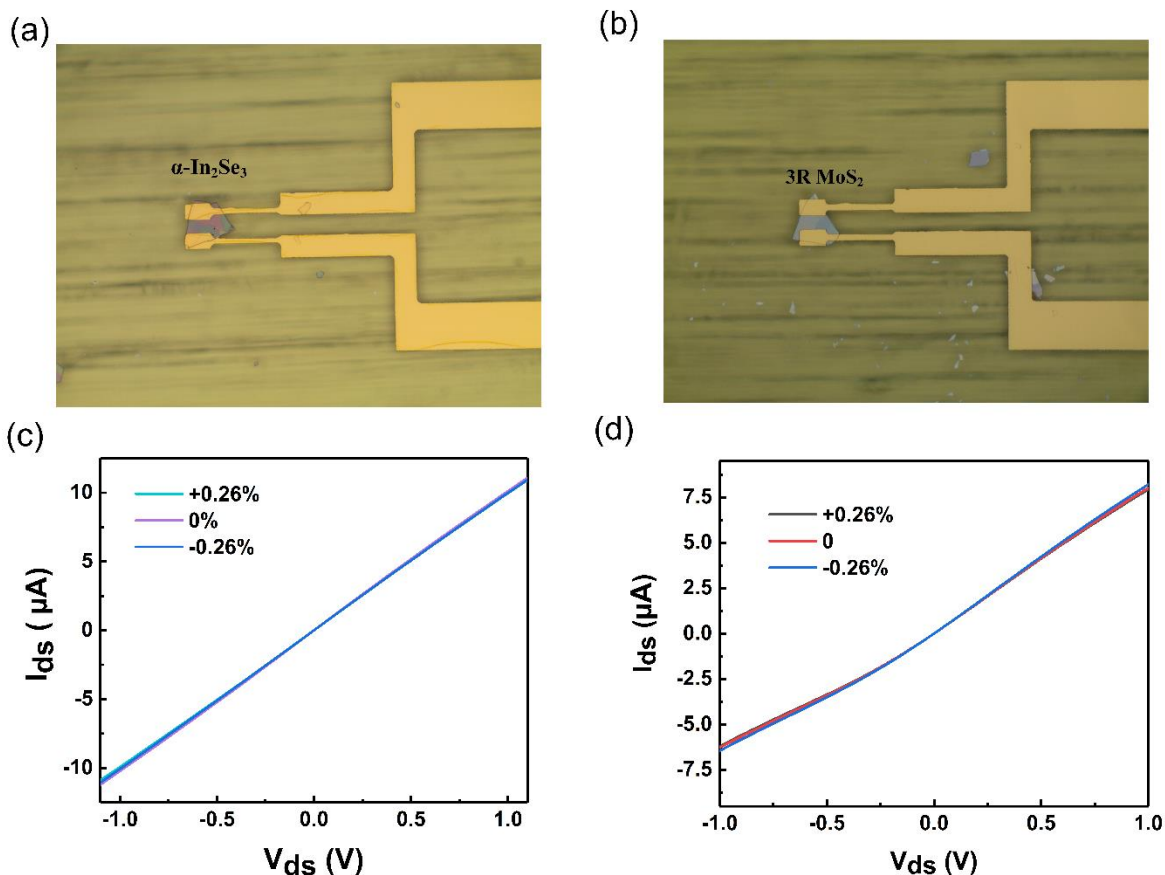

**Fig. S2** Optical images and  $I$ - $V$  characteristics of  $\alpha$ -In<sub>2</sub>Se<sub>3</sub> and 3R MoS<sub>2</sub> flakes. **a** One pair of Cr/Au (10/150nm) electrodes were deposited on an  $\alpha$ -In<sub>2</sub>Se<sub>3</sub> flake. **b** One pair of Pd/Au (10/150nm) electrodes were deposited on a 3R MoS<sub>2</sub> flake. **c**  $I$ - $V$  characteristics of the  $\alpha$ -In<sub>2</sub>Se<sub>3</sub> sample shown in **a** with no strain, a tensile strain of +0.26% and a compressive strain of -0.26%. **d**  $I$ - $V$  characteristics of the 3R MoS<sub>2</sub> sample shown in **b** with no strain, a tensile strain of +0.26% and a compressive strain of -0.26%

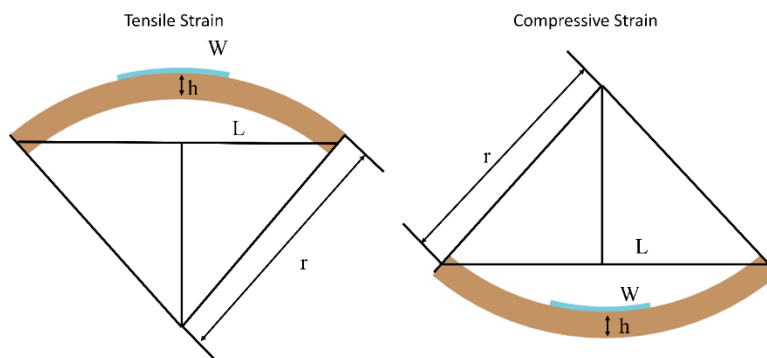

**Fig. S3** Illustration of the mechanical strain applied onto the thin layers in blue

Since the dimensions of the  $\alpha$ -In<sub>2</sub>Se<sub>3</sub> and 3R MoS<sub>2</sub> flakes ( $\sim 20 \mu\text{m}$  long and a few tens of nanometer thick) are much smaller than the PI substrate deposited on the stainless steel ( $15 \text{ mm} \times 15 \text{ mm} \times 300 \mu\text{m}$ ), the tensile and compressive strains exerted onto the flakes deposited onto

the PI substrate could be given by  $\varepsilon = h/2r$ , where  $h$  is the thickness of the PI substrate,  $L$  is the bended length of the device and  $r$  is the bending radius. The strain  $\varepsilon$  was calculated and shown in Table S1.

**Table S1** Parameters for calculating the applied strains

| H ( $\mu\text{m}$ ) | L (mm) | r (mm) | $\varepsilon$ |
|---------------------|--------|--------|---------------|
| 300                 | 14     | 11.74  | 0.13%         |
| 300                 | 11.5   | 5.68   | 0.26%         |
| 300                 | 8.5    | 4.31   | 0.35%         |

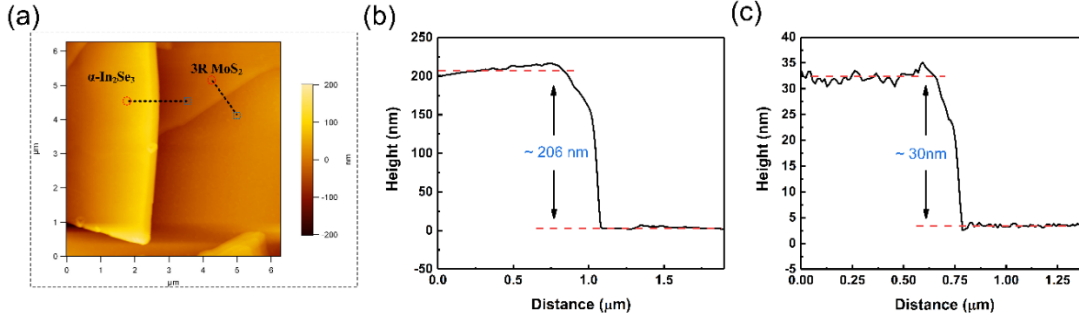

**Fig. S4** **a** AFM image of the  $\alpha\text{-In}_2\text{Se}_3/3\text{R MoS}_2$  heterojunction (**Fig. 1c**). **b** Height profile of the  $\alpha\text{-In}_2\text{Se}_3$  flake. **c** Height profile of the  $3\text{R MoS}_2$  flake

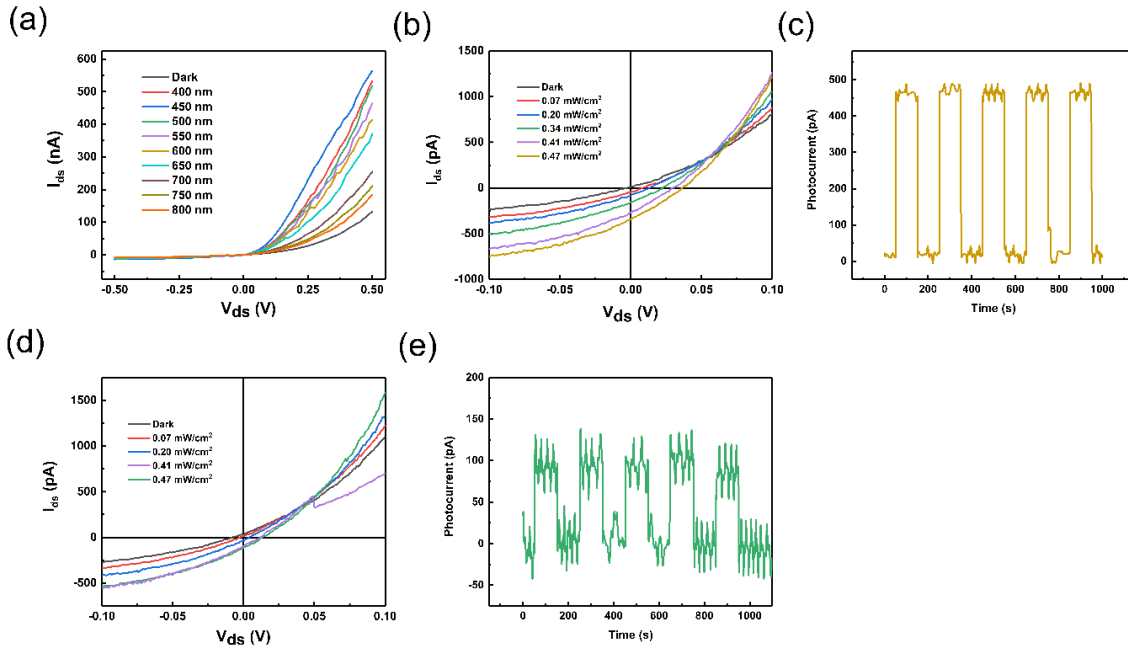

**Fig. S5** Photoresponse from the  $\alpha\text{-In}_2\text{Se}_3/3\text{R MoS}_2$  heterojunction (**Fig. 1c**) under several different light intensities under zero strain. **a**  $I$ - $V$  characteristic under illumination intensity of  $0.47 \text{ mW/cm}^2$  with different wavelengths. **b**  $I$ - $V$  characteristics under the dark and  $532 \text{ nm}$  illumination with different intensities. **c** Current vs time under the  $532 \text{ nm}$  illumination intensity of  $0.47 \text{ mW/cm}^2$ . **d**  $I$ - $V$  characteristics under the dark and  $800 \text{ nm}$  illumination with different intensities. **e** Current vs time under  $800\text{nm}$  illumination intensity of  $0.47 \text{ mW/cm}^2$  with zero bias voltage

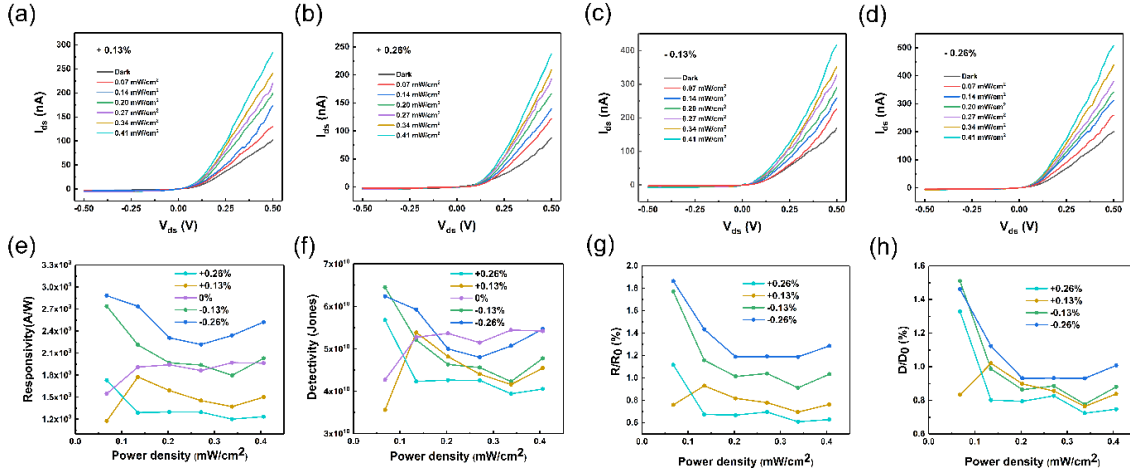

**Fig. S6 a-d**  $I$ - $V$  characteristics of the  $\alpha$ - $\text{In}_2\text{Se}_3/3\text{R MoS}_2$  heterojunction (Fig 1c) from -0.5 V to 0.5 V under the dark and various 532 nm light illumination intensities with the strain of +0.13%, +0.26%, -0.13% and -0.26%. **e-f** Responsivity, detectivity, relative change of the responsivity and relative change of detectivity with respect to that under zero strain as a function of the light intensities and strains under +0.5 V bias (The data were extracted from **Fig. S6a-d**)

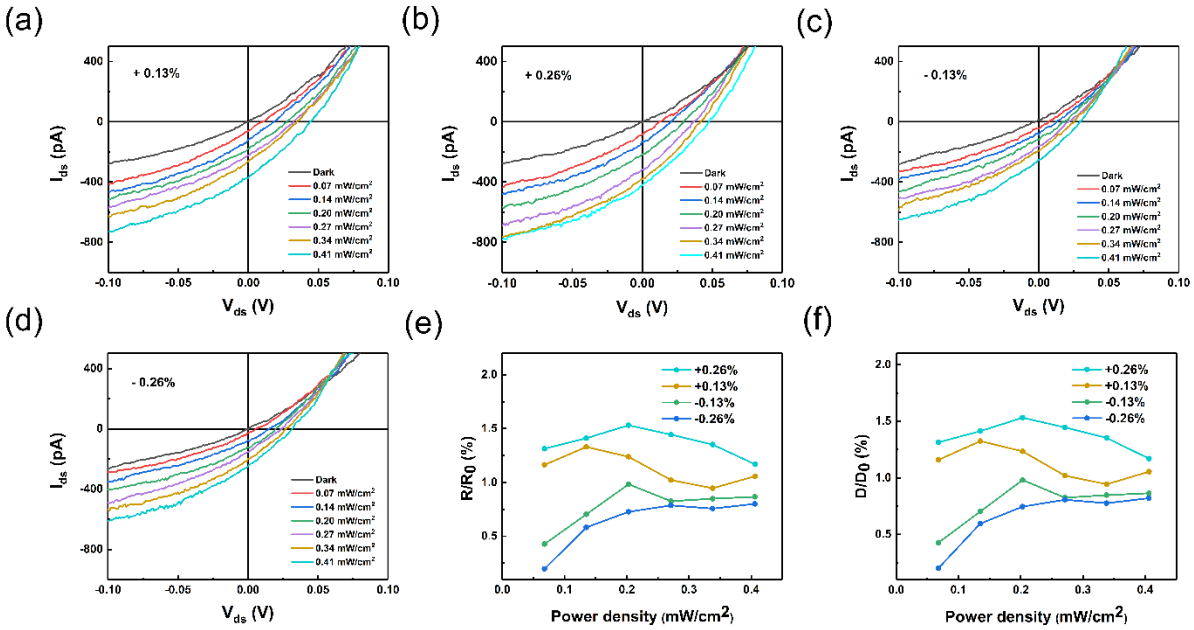

**Fig. S7 a-d**  $I$ - $V$  characteristics of the  $\alpha$ - $\text{In}_2\text{Se}_3/3\text{R MoS}_2$  heterojunction (**Fig. 1c**) from -0.1 V to 0.1 V under the dark and illumination of 532 nm wavelength under different light intensities with the strain of +0.13%, +0.26%, -0.13% and -0.26%. **e, f** Relative change of the responsivity and detectivity with respect to that under zero strain as a function of the light intensities and strains under the bias voltage of -0.1 V (The data were extracted from **Fig. S7a-d**)

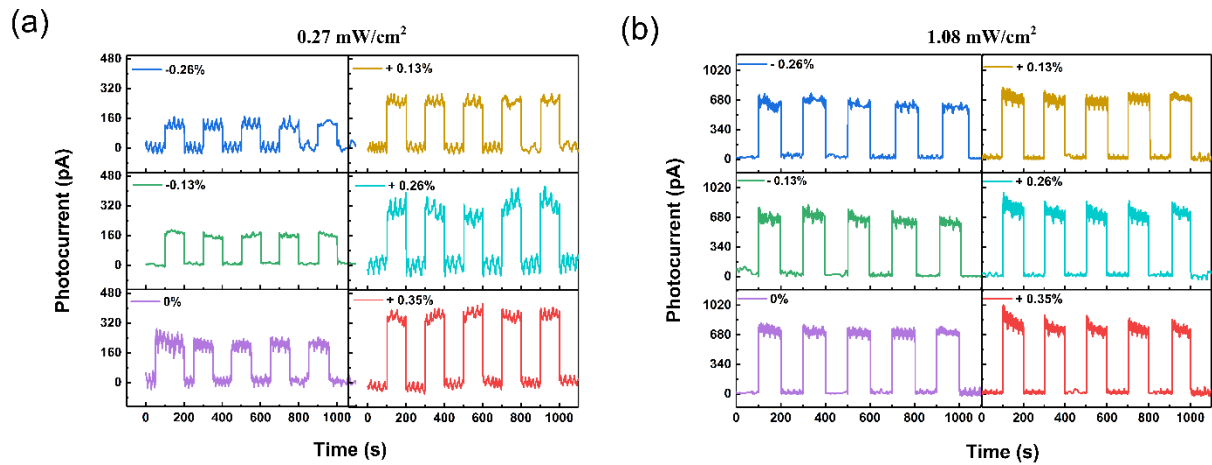

**Fig. S8 a, b**  $I-t$  of the heterojunction (**Fig. 1c**) under zero bias and several strains at the 532 nm light intensity of  $0.27 \text{ mW/cm}^2$  and  $1.08 \text{ mW cm}^{-2}$
